# Supplementary material for: Characterization of organic release kinetics in particleboard using a dual model fitting methodology
Source: Royal Society of Chemistry journal article supplement (doi:10.1039/d3ra03587e), 2023-01-01
Supplement: d3ra03587e1.pdf [file d3ra03587e1.pdf]

Electronic Supplementary Information (ESI) for RSC Advances.

## **Characterization of organic release kinetics in particleboard by the dual model fitting methodology**

Guodong Yuan<sup>\*a</sup>, Huiwen Yuan<sup>a</sup>, Yingfeng Zhao<sup>a</sup> and Zhi Liang<sup>a</sup>

<sup>a</sup>National Center of Inspection & Testing on Building Materials Products Quality (Nanjing), Nanjing Institute of Product Quality Inspection (Nanjing Institute of Quality Development and Advanced Technology Application), Nanjing 211102, China.

\*Corresponding author, Guodong Yuan, E-mail: DG1524109@smail.nju.edu.cn

**Table S1 Determination conditions of TD-GC-MS**

| <b>TD</b>                   |                                                                                                                                                                                                                 |
|-----------------------------|-----------------------------------------------------------------------------------------------------------------------------------------------------------------------------------------------------------------|
| Adsorption tube type        | Tenax-TA                                                                                                                                                                                                        |
| Tube desorption temperature | 280 °C                                                                                                                                                                                                          |
| Tube desorption time        | 15 min                                                                                                                                                                                                          |
| Cold trap temperature       | Low: -20 °C; High: 300 °C                                                                                                                                                                                       |
| Cold trap desorption time   | 3 min                                                                                                                                                                                                           |
| Transfer line temperature   | 150 °C                                                                                                                                                                                                          |
| <b>GC</b>                   |                                                                                                                                                                                                                 |
| Injector temperature        | 270 °C                                                                                                                                                                                                          |
| Column                      | HP-5MS, 30 m × 250 μm × 0.25 μm                                                                                                                                                                                 |
| Carrier gas                 | He                                                                                                                                                                                                              |
| Constant flow               | 1.4 mL·min <sup>-1</sup>                                                                                                                                                                                        |
| Temperature program         | The initial temperature was held at 30°C for 2 min, then heated at the rate of 30°C·min <sup>-1</sup> to 250°C and held for 1min., then heated at the rate of 6°C·min <sup>-1</sup> to 300°C and held for 1 min |
| <b>MS</b>                   |                                                                                                                                                                                                                 |
| Ion source EI               | 70 eV                                                                                                                                                                                                           |
| Ion source temperature      | 200 °C                                                                                                                                                                                                          |
| Quadrupole temperature      | 150 °C                                                                                                                                                                                                          |
| Mass range Scan mode        | 10-1000 amu                                                                                                                                                                                                     |
| Transfer line temperature   | 280 °C                                                                                                                                                                                                          |

**Table S2. Important detectable of particle board**

| <b>Compound Name</b> | <b>Boiling Point (°C)</b> | <b>Vapor Pressure (mmHg)</b> | <b>Qualitative ion (m/z)</b> | <b>Quantitative ion (m/z)</b> |
|----------------------|---------------------------|------------------------------|------------------------------|-------------------------------|
| Methyl mercaptan     | 6                         | 1536 ( 20 °C)                | 48                           | 47                            |
| Isoprene             | 34                        | 550 ( 25 °C)                 | 68                           | 67                            |
| Formic acid          | 100-101                   | 52 ( 37 °C)                  | 46                           | 45                            |
| Dimethyl acetal      | 64                        | 187.1 (25 °C)                | 75                           | 59                            |
| Butenone             | 80                        | 310 ( 55 °C)                 | 70                           | 55                            |
| Butyraldehyde        | 75                        | 90 ( 20 °C)                  | 72                           | 57                            |
| Acetic acid          | 117-118                   | 11.4 ( 20 °C)                | 60                           | 45                            |
| Trichloromethane     | 61                        | 160 ( 20 °C)                 | 118,85                       | 83                            |
| Tetrahydrofuran      | 66                        | <0.01 ( 25 °C)               | 72                           | 71                            |
| Dichloroethane       | 82-84                     | 83.9 (25 °C)                 | 98                           | 62                            |
| 1,4-Dioxane          | 101                       | 27 ( 20 °C)                  | 88                           | 58                            |
| Toluene              | 110-111                   | 22 ( 20 °C)                  | 92                           | 91                            |
| Cyclohexanone        | 155                       | 3.4 ( 20 °C)                 | 98                           | 55                            |
| Phenol               | 182                       | 0.35 ( 25 °C)                | 94                           | 66                            |
| 2-Methylphenol       | 191                       | 0.3 ( 20 °C)                 | 108                          | 107                           |
| Octanoic acid        | 237                       | 1 ( 78 °C)                   | 115                          | 101                           |
| Naphthalene          | 218                       | 0.03 ( 25 °C)                | 128                          | 127                           |
| Nonanoic acid        | 268-269                   | <0.1 ( 20 °C)                | 158                          | 129                           |
| p-tert-Butylphenol   | 236-238                   | 1 ( 70 °C)                   | 150                          | 135                           |
| 1-Methylnaphthalene  | 240-243                   | 0.1 (25 °C)                  | 142                          | 141                           |
| Phthalic anhydride   | 284                       | <0.01 ( 20 °C)               | 148                          | 104                           |
| Decanoic acid        | 268-270                   | 15 ( 160 °C)                 | 172                          | 129                           |
| Dibutyl phthalate    | 340                       | 1 ( 147 °C)                  | 223,205                      | 149                           |

**Table S3 Biexponential model fitting parameters for toluene release**

| Fitting parameter name     | Fitting parameter value                     |
|----------------------------|---------------------------------------------|
| Release rate for Phase 1   | 0.11                                        |
| Decay constant for Phase 1 | 1.9                                         |
| Release rate for Phase 2   | 0.012                                       |
| Decay constant for Phase 2 | 0.003                                       |
| Emission factor            | $E(t)=0.11 * e^{-1.9t}+0.012 * e^{-0.003t}$ |

**Table S4 Mass transfer model fitting parameters for toluene release**

| Parameters set in the experiment                     |                                    |                      |                                                          |                    |       |                |
|------------------------------------------------------|------------------------------------|----------------------|----------------------------------------------------------|--------------------|-------|----------------|
| A(m <sup>2</sup> )                                   | δ(m)                               | V(m <sup>3</sup> )   | Q(m <sup>3</sup> /s)                                     | β                  |       |                |
| 0.5                                                  | 0.009                              | 1                    | 1/3600                                                   | 0.0045             |       |                |
| Theoretical parameters derived from software         |                                    |                      |                                                          |                    |       |                |
| D <sub>s</sub> (m <sup>2</sup> /s) <sup>#</sup>      | K                                  | h <sub>m</sub> (m/s) | a                                                        | Bi <sub>m</sub> /K | q     | G <sub>1</sub> |
| 3.39E-10                                             | 7.06E+02                           | 0.000424             | 66.37                                                    | 15.94              | 1.414 | 102.504        |
| Parameters obtained by fitting the experimental data |                                    |                      | The equation corresponding to the linear fit of the data |                    |       |                |
| C <sub>0</sub> (μg/m <sup>3</sup> )                  | D <sub>m</sub> (m <sup>2</sup> /s) |                      | b=ln(3.06E-06*C <sub>0</sub> )                           |                    |       |                |
| 1.7E+06                                              | 1.6E-11                            |                      | k=-24683.9*D <sub>m</sub>                                |                    |       |                |

# Software estimation value of D<sub>m</sub>, the same below.

**Table S5 Biexponential model fitting parameters for dimethyl acetal**

| <b>Fitting parameter name</b> | <b>Fitting parameter value</b>             |
|-------------------------------|--------------------------------------------|
| Release rate for Phase 1      | 0.0677                                     |
| Decay constant for Phase 1    | 1.16                                       |
| Release rate for Phase 2      | 0.0114                                     |
| Decay constant for Phase 2    | 0.01                                       |
| Emission factor               | $E(t)=0.0677*e^{-1.16t}+0.0114*e^{-0.01t}$ |

**Table S6 Mass transfer model fitting parameters for dimethyl acetal**

| <b>Parameters set in the experiment</b>                     |                                    |                      |                                                                 |                    |       |                |
|-------------------------------------------------------------|------------------------------------|----------------------|-----------------------------------------------------------------|--------------------|-------|----------------|
| A(m <sup>2</sup> )                                          | $\delta$ (m)                       | V(m <sup>3</sup> )   | Q(m <sup>3</sup> /s)                                            | $\beta$            |       |                |
| 0.5                                                         | 0.009                              | 1                    | 1/3600                                                          | 0.0045             |       |                |
| <b>Theoretical parameters derived from software</b>         |                                    |                      |                                                                 |                    |       |                |
| D <sub>s</sub> (m <sup>2</sup> /s)                          | K                                  | h <sub>m</sub> (m/s) | a                                                               | Bi <sub>m</sub> /K | q     | G <sub>1</sub> |
| 2.56E-08                                                    | 73.98                              | 0.000506             | 0.88                                                            | 2.4                | 0.746 | 1.17426        |
| <b>Parameters obtained by fitting the experimental data</b> |                                    |                      | <b>The equation corresponding to the linear fit of the data</b> |                    |       |                |
| C <sub>0</sub> ( $\mu$ g/m <sup>3</sup> )                   | D <sub>m</sub> (m <sup>2</sup> /s) |                      | b=ln(7.4E-05*C <sub>0</sub> )                                   |                    |       |                |
| 4.3E+03                                                     | 3.9E-10                            |                      | k=-6870.6*D <sub>m</sub>                                        |                    |       |                |

**Table S7 Biexponential model fitting parameters for decanoic acid**

| Fitting parameter name     | Fitting parameter value                   |
|----------------------------|-------------------------------------------|
| Release rate for Phase 1   | 0.022                                     |
| Decay constant for Phase 1 | 0.26                                      |
| Release rate for Phase 2   | 0.001                                     |
| Decay constant for Phase 2 | 0.005                                     |
| Emission factor            | $E(t)=0.022*e^{-0.26t}+0.001*e^{-0.005t}$ |

**Table S8 Mass transfer model fitting parameters for decanoic acid**

| Parameters set in the experiment                     |          |                                    |                                                          |                    |       |                |
|------------------------------------------------------|----------|------------------------------------|----------------------------------------------------------|--------------------|-------|----------------|
| A(m <sup>2</sup> )                                   | δ(m)     | V(m <sup>3</sup> )                 | Q(m <sup>3</sup> /s)                                     | β                  |       |                |
| 0.5                                                  | 0.009    | 1                                  | 1/3600                                                   | 0.0045             |       |                |
| Theoretical parameters derived from software         |          |                                    |                                                          |                    |       |                |
| D <sub>s</sub> (m <sup>2</sup> /s)                   | K        | h <sub>m</sub> (m/s)               | a                                                        | Bi <sub>m</sub> /K | q     | G <sub>1</sub> |
| 4.28E-12                                             | 5.047E06 | 0.000352                           | 5257                                                     | 0.15               | 0.297 | 10351.8        |
| Parameters obtained by fitting the experimental data |          |                                    | The equation corresponding to the linear fit of the data |                    |       |                |
| C <sub>0</sub> (μg/m <sup>3</sup> )                  |          | D <sub>m</sub> (m <sup>2</sup> /s) | b=ln(1.3E-09*C <sub>0</sub> )                            |                    |       |                |
| 5.0E+08                                              |          | 2.3E-09                            | k=-1089*D <sub>m</sub>                                   |                    |       |                |

**Table S9 Biexponential model fitting parameters for phenol**

| Fitting parameter name     | Fitting parameter value                     |
|----------------------------|---------------------------------------------|
| Release rate for Phase 1   | 0.0045                                      |
| Decay constant for Phase 1 | 0.0048                                      |
| Release rate for Phase 2   | 0.003                                       |
| Decay constant for Phase 2 | 0.13                                        |
| Emission factor            | $E(t)=0.0045*e^{-0.0048t}+0.003*e^{-0.13t}$ |

**Table S10 Mass transfer model fitting parameters for phenol**

| Parameters set in the experiment                     |              |                                    |                                                          |                    |       |                |
|------------------------------------------------------|--------------|------------------------------------|----------------------------------------------------------|--------------------|-------|----------------|
| A(m <sup>2</sup> )                                   | $\delta$ (m) | V(m <sup>3</sup> )                 | Q(m <sup>3</sup> /s)                                     | $\beta$            |       |                |
| 0.5                                                  | 0.009        | 1                                  | 1/3600                                                   | 0.0045             |       |                |
| Theoretical parameters derived from software         |              |                                    |                                                          |                    |       |                |
| D <sub>s</sub> (m <sup>2</sup> /s)                   | K            | h <sub>m</sub> (m/s)               | a                                                        | Bi <sub>m</sub> /K | q     | G <sub>1</sub> |
| 2.83E-10                                             | 2.47E+04     | 0.000439                           | 79.5                                                     | 0.565              | 0.534 | 151.763        |
| Parameters obtained by fitting the experimental data |              |                                    | The equation corresponding to the linear fit of the data |                    |       |                |
| C <sub>0</sub> ( $\mu$ g/m <sup>3</sup> )            |              | D <sub>m</sub> (m <sup>2</sup> /s) | b=ln(2.95E-07*C <sub>0</sub> )                           |                    |       |                |
| 7.3E+06                                              |              | 3.98E-10                           | k=-3520.4*D <sub>m</sub>                                 |                    |       |                |
